# Supplementary material for: Prediction of Premature Termination Codon Suppressing Compounds for Treatment of Duchenne Muscular Dystrophy Using Machine Learning
Source: PubMed Central journal article supplement (PMC7503396; doi:10.3390/molecules25173886), 2020-08-26
Supplement: molecules-25-03886-s001.pdf [file molecules-25-03886-s001.pdf]

# Prediction of Premature Termination Codon Suppressing Compounds for Treatment of Duchenne Muscular Dystrophy using Machine Learning

Kate Wang et al.

**Supplemental Table S1.** Drugs selected by Pharmacophore-based, ML-based and DL-based search in the FDA-approved drugs database

| Pharmacophore                                                | WEKA                                            | TF                              |
|--------------------------------------------------------------|-------------------------------------------------|---------------------------------|
| 1-Palmitoyl-2-oleoyl-sn-glycero-3-(phospho-rac-(1-glycerol)) | 5-O-phosphono-alpha-D-ribofuranosyl diphosphate | Acarbose                        |
| Amikacin                                                     | Acetylcarnitine                                 | Acetarsol                       |
| Arbutamine                                                   | Acetylcholine                                   | Adenosine                       |
|                                                              |                                                 | Aldehydo-N-Acetyl-D-Glucosamine |
| Benserazide                                                  | Acyclovir                                       | Alendronic acid                 |
| Bisoprolol                                                   | Adefovir dipivoxil                              | Alginate acid                   |
| Brivudine                                                    | Alfentanil                                      | alpha-Arbutin                   |
| Cefamandole                                                  | Alitretinoin                                    | Amikacin                        |
| Cefdinir                                                     | Azithromycin                                    | Amiloride                       |
| Cefixime                                                     | Balsalazide                                     | Arbutin                         |
| Cefonicid                                                    | Bethanechol                                     | Ascorbic acid calcium salt      |
| Ceforanide                                                   | Bicalutamide                                    | Auranofin                       |
| Cefotetan                                                    | Calcium glubionate                              | Azacitidine                     |
| Ceftibuten                                                   | Cangrelor                                       | Benserazide                     |
| Ceftolozane                                                  | Capecitabine                                    | Besifloxacin                    |
| Cerivastatin                                                 | Carbamoylcholine                                | beta-L-fructofuranose           |
| Chlortetracycline                                            | Carisoprodol                                    | Bictegravir                     |
| Cilastatin                                                   | Chlorobutanol                                   | Bismuth subgallate              |
| Citicoline                                                   | Cidofovir                                       | Bleomycin                       |
| Cladribine                                                   | Clodronic acid                                  | Bortezomib                      |
| Clarithromycin                                               | Colistimethate                                  | Bromotheophylline               |
| Clindamycin                                                  | Cyclandelate                                    | Calcium threonate               |
| Clofarabine                                                  | Dexpanthenol                                    | Capecitabine                    |
| Cromoglicic acid                                             | Edoxudine                                       | Capreomycin                     |
| Demeclocycline                                               | Elbasvir                                        | Carbidopa                       |
| Diaminopropanol tetraacetic acid                             | Erdosteine                                      | Carbocisteine                   |
| Diazolidinylurea                                             | Ethchlorvynol                                   | Carboplatin                     |
| Dibekacin                                                    | Ethinamate                                      | Cefotetan                       |
| Dinoprostone                                                 | Famotidine                                      |                                 |

|                       |                             |                         |
|-----------------------|-----------------------------|-------------------------|
| Dipyridamole          | Fidaxomicin                 | Chlormerodrin           |
| Doripenem             | Flavin adenine dinucleotide | Chlortetracycline       |
| Doxycycline           | Flurandrenolide             | cis-Platin              |
| Eliglustat            | Fluticasone                 | Clofarabine             |
| Eluxadoline           | Fondaparinux                | Crisaborole             |
| Empagliflozin         | Fosaprepitant               | Cytarabine              |
| Eribulin              | Fostamatinib                | Dacarbazine             |
| Ertapenem             | Gabapentin enacarbil        | Danthron                |
| Erythromycin          | Gemifloxacin                | Decitabine              |
| Esculin               | Glecaprevir                 | Delafloxacin            |
| Fenoterol             | Gluconic Acid               | Demeclocycline          |
| Flavin mononucleotide | Glycine betaine             | Desflurane              |
| Framycetin            | Hexetidine                  | Deslanoside             |
| Gadobenate            | Hyaluronic acid             | Dexpanthenol            |
| Gadopentetic acid     | Hydroxyethyl cellulose      | Dextrothyroxine         |
| Gentamicin            | Idoxuridine                 | D-glucose               |
| Gluconic acid         | Imidurea                    | Diazolidinyurea         |
| Ibandronate           | Inulin                      | Dibekacin               |
| Kanamycin             | Isavuconazole               | Diflorasone             |
| Lactulose             | Isotretinoin                | Diflunisal              |
| Latamoxef             | Lamivudine                  | Dihydralazine           |
| L-Cysteine            | Leflunomide                 | Diosmin                 |
|                       |                             | Dipentamethylenethiuram |
| Lincomycin            | Levocarnitine               | disulfide               |
| Lisinopril            | Linagliptin                 | Disulfiram              |
| Lymecycline           | Lynestrenol                 | Ditiocarb Zinc          |
| Mangafodipir          | Medronic acid               | Dopamine                |
| Mannitol busulfan     | Memantine                   | Doxorubicin             |
| Menadiol diphosphate  | Methacholine                | Doxycycline             |
| Methacycline          | Methenamine                 | Droxidopa               |
| Micronomicin          | Methohexital                | Edetic Acid             |
| Mitoxantrone          | Methylchloroisothiazolinone | Eflornithine            |
| Moxifloxacin          | Methylprednisone            | Emtricitabine           |
| Nadolol               | Mupirocin                   | Epirubicin              |
| Nelarabine            | Nizatidine                  | Eravacycline            |
| Netilmicin            | Norgestrel                  | Esculin                 |
| Pantethine            | Novobiocin                  | Ferrostrene             |
| Pemetrexed            | Nystatin                    | Floxuridine             |
| Pentostatin           | Opicapone                   | Fludarabine             |
| Peramivir             | Oritavancin                 | Fludeoxyglucose         |
| Plerixafor            | Pamidronic acid             | Flumethasone            |
| Pravastatin           | Pantothenic acid            | Framycetin              |
| Protokylol            | Pargyline                   | Gadobutrol              |

|                |                       |                        |
|----------------|-----------------------|------------------------|
| Regadenoson    | Pentafluoropropane    | Gadodiamide            |
| Riboflavin     | Pentobarbital         | Galactose              |
| Ribostamycin   | Pentosan Polysulfate  | Gaxilose               |
| Rifabutin      | Permethrin            | Gemcitabine            |
| Rolitetracline | Pibrentasvir          | Gemifloxacin           |
| Rosuvastatin   | Plicamycin            | Gentamicin             |
| Rutin          | Polythiazide          | Gluconolactone         |
| Sarecycline    | Pralatrexate          | Glucosamine            |
| Somatostatin   | Pyrophosphoric acid   | Glycol salicylate      |
| Sorbitol       | Ranitidine            | Hesperidin             |
| Spectinomycin  | Rivaroxaban           | Hyaluronan             |
| Steviolbioside | Roxithromycin         | Hydrogen peroxide      |
| Streptozocin   | Saxagliptin           | Imidazolidinyl Urea    |
| Sulfoxone      | Selegiline            | Imipenem               |
| Temocillin     | Semaglutide           | Inositol               |
| Tetracycline   | Sevoflurane           | Iohexol                |
| Tezacaftor     | Sitagliptin           | Iomeprol               |
| Tobramycin     | Sofosbuvir            | Iopamidol              |
| Travoprost     | Stavudine             | Iotalamic Acid         |
| Unoprostone    | Stiripentol           | Ioversol               |
| Valganciclovir | Sugammadex            | Ioxitalamic acid       |
| Valrubicin     | Sulfasalazine         | Isoprinosine           |
| Vilanterol     | Sultamicillin         | Isosorbide mononitrate |
| Zanamivir      | Tacrolimus            | Ixazomib               |
|                | Taurolidine           | Kanamycin              |
|                | Telavancin            | Lactose                |
|                | Telbivudine           | Lactulose              |
|                | Terbinafine           | L-Ascorbic Acid        |
|                | Tesamorelin           | L-Cysteine             |
|                | Thiopental            | Levodopa               |
|                | Ticagrelor            | Levonordefrin          |
|                | Tioconazole           | Levothyroxine          |
|                | Tretinoin             | Lincomycin             |
|                | Triclofos             | Liothyronine           |
|                | Troleandomycin        | Liotrix                |
|                | Trypan blue free acid | L-Lysine               |
|                | Valaciclovir          | Lodoxamide             |
|                | Vancomycin            | Lymecycline            |
|                | Vildagliptin          | Magnesium              |
|                | Vitamin A             | Magnesium ascorbate    |
|                | Voriconazole          | Mannitol               |
|                | Xanthinol             | Methacycline           |
|                | Zalcitabine           | Methyldopa             |

|                  |                       |
|------------------|-----------------------|
| Zidovudine       | Micronomicin          |
| Paromomycin      | Miglitol              |
| Lactose          | Miglustat             |
| Sucrose          | Minocycline           |
| Gaxilose         | Mithramycin           |
| Gemcitabine      | Nedaplatin            |
| Fludarabine      | Nelarabine            |
| Delafloxacin     | Netilmicin            |
| Eflornithine     | Niacinamide ascorbate |
| Azacididine      | Nitroferricyanide     |
| Cytarabine       | Norepinephrine        |
| Streptomycin     | Omadacycline          |
| Alginic acid     | Ouabain               |
| Emtricitabine    | Oxaliplatin           |
| Trifluridine     | Oxidronic acid        |
| Plazomicin       | Oxytetracycline       |
| Bleomycin        | Paromomycin           |
| Hesperidin       | Perboric acid         |
| Diosmin          | Perflubutane          |
| Floxuridine      | Perflutren            |
| Epirubicin       | Plazomicin            |
| Doxorubicin      | Plecanatide           |
| Gadobutrol       | Prussian Blue         |
| Bictegravir      | Ramidronic Acid       |
| Amiloride        | Regadenoson           |
| Temozolomide     | Ribavirin             |
| Decitabine       | Riboflavin            |
| Deslanoside      | Ribostamycin          |
| Teriflunomide    | Risedronic acid       |
| Cilastatin       | Rutin                 |
| Citicoline       | Sapropterin           |
| Cladribine       | Sarecycline           |
| Clindamycin      | Selenomethionine      |
| Erythromycin     | Sodium ascorbate      |
| Ibandronate      | Sodium aurothiomalate |
| Temocillin       | Sorbitol              |
| Tezacaftor       | Sparfloxacin          |
| Valganciclovir   | Spectinomycin         |
| Amikacin         | Steviolbioside        |
| Diazolidinylurea | Streptomycin          |
| Dibekacin        | Streptozocin          |
| Framycetin       | Sucralfat             |
| Gentamicin       | Sucrose               |

Kanamycin  
Lactulose  
Lymecycline  
Micronomicin  
Netilmicin  
Regadenoson  
Ribostamycin  
Rutin  
Steviolbioside  
Streptozocin  
Tobramycin

Tavaborole  
Tegafur  
Tegafur-uracil  
Temozolomide  
Teriflunomide  
Tetracycline  
Thimerosal  
Thiram  
Titanium dioxide  
Tobramycin  
Triamcinolone  
Trifluridine  
Triflusal  
Trovafloxacin  
Vaborbactam  
Vidarabine  
Viomycin  
Xylose  
Zanamivir  
Zoledronic Acid

---
